# Supplementary material for: New Specimens of Nemegtomaia from the Baruungoyot and Nemegt Formations (Late Cretaceous) of Mongolia
Source: PLoS One. 2012 Feb 8;7(2):e31330. doi: 10.1371/journal.pone.0031330 (PMC3275628; doi:10.1371/journal.pone.0031330)
Supplement: Table S4 — Selected measurements of oviraptorids. Selected measurements of oviraptorids used for calculating the lengths of missing elements in MPC-D 107/15 and MPC-D 107/16. Measures in millimeters (PJC). Abbreviations: SL, skull length (preferably from the edge of paraoccipital process to the tip of the premaxilla, but in most cases taken from the quadrate to the premaxilla); Pm1, premaxilla height (below naris); Pm2, premaxilla height; Ao sl, antorbital skull length; o l, orbital length; d, dentary length; d 2, dentary maximum height; j l, jaw length; sc l, scapula blade length; sc sw, scapula shaft width; h l, humerus length; h sw, humerus shaft width; r l, radius length; r sw, radius shaft width; u l, ulna length; u sw, ulna shaft width; mc I, metacarpal 1; mc II, metacarpal 2; mc III, metacarpal 3; I-1, first digit, first phalanx; I-2, first digit, second phalanx; II-1, second digit, first phalanx; II-2, second digit, second phalanx; II-3, second digit, third phalanx; III-1, third digit, first phalanx; il l, ilium length; f l, femur length; f sw, femur shaft width; f c, femur shaft circumference; t l, tibia length; t sw, tibia shaft width; III-3, digit three, third phalanx; IV-2, digit four, second phalanx; IV-3, digit four, third phalanx; IV-4, digit four, fourth phalanx; IV-5, digit four, fifth phalanx. Additional data on oviraptorid specimens: Gigantoraptor erlianensis [79]; Hagryphus giganteus [80]; Heyuannia huangi [81]; Oviraptor philoceratops [1]; Oviraptor incertae sedis [82]. (XLS) [file pone.0031330.s004.xls]

## Sheet: Table S4
Table S4
Selected measurements of oviraptorids
Species		SL	Pm1	Pm2	Ao sl	o l	d	d 2	j l	sc l	sc sw	h l	h sw	r l	r sw	u l	u sw	mc I	mc II	mc III	I-1	I-2	II-1	II-2	II-3	III-1	il l	f l	f sw	f c	t l	t sw	III-3	IV-2	IV-3	IV-4	IV-5
Citipati n.sp.
MPC-D100/42		180	-	-	86	45	85	54	153	195	15.9	205	22	180	10.3	188	14.5	47	104	99	89.5	76	57	70	64	35.7	290	305	?	95	380	?	31	24	30.5	26	45
Citipati osmolskae
MPC-D100/978**		160	-	-	74	43	80	53	151	?	?	?	?	?	?	?	?	?	?	?	?	?	?	?	?	?	?	?	?	?	?	?	?	?	?	?	?
MPC-D100/979		?	-	-	?	?	?	?	?	?	?	215	33.5	198	17.2	214	19.4	45e	89.5	89.4	88.4	91.1	65.5	61.5	76	33.8	?	?	?	?	?	?	?	24.9	20.1	19	48.4
Conchoraptor gracilis
MPC-D100/38		?	-	-	?	?	?	?	?	?	?	?	?	?	?	?	?	24.6	42.8	41.4	32.9	28e	18plus	26.3	23est	17.6	?	?	?	?	?	?	?	?	?	?	?
MPC-D100/42		?	-	-	?	?	?	?	?	?	?	?	?	?	?	?	?	?	?	?	?	?	?	?	?	?	?	?	?	?	225	?	17.4	18.2	13.1	11.9	25.5
MPC-D100/46		?	-	-	?	?	?	?	?	?	?	?	?	?	?	?	?	?	?	?	?	?	?	?	?	?	?	?	?	?	?	?	18.2	15.9	11.5	11.2	24.9
MPC-D102/01		?	-	-	?	?	?	?	?	?	?	?	?	?	?	?	?	?	?	?	?	?	?	?	?	?	?	?	?	?	?	32	?	15.2	?	?	?
MPC-D102/03		?	-	-	?	37	?	?	?	140plus	12.6	?	13	99	6.8	100.1	8.6	24	44est	?	31	42	18.3	15.2	22	?	226	240	25.5	?	277	24	17.2	14.4	10.9	8.7	33
MPC-D110/07		94	-	-	45e	?	48	32	87.2	?	?	?	?	?	?	?	?	?	?	?	?	?	?	?	?	?	?	?	?	?	?	?	?	?	?	?	?
MPC-D110/10		?	-	-	?	?	?	20e	55e	?	?	?	?	?	?	?	?	?	?	?	?	?	?	?	?	?	?	?	?	?	?	?	?	?	?	?	?
MPC-D110/11		?	-	-	?	34.8	?	?	?	?	?	?	?	?	?	?	?	?	?	?	?	?	?	?	?	?	?	?	?	?	?	?	?	?	?	?	?
MPC-D110/12		101e	-	-	?	?	?	33	?	?	?	?	?	?	?	?	?	?	?	?	?	?	?	?	?	?	?	?	?	?	?	?	?	?	?	?	?
MPC-D110/18a		?	-	-	?	?	?	?	?	?	?	91.1	10.8	87.3	6.8	88.2	8	?	?	?	?	?	?	?	?	?	?	?	?	?	?	?	?	?	?	?	?
MPC-D110/18b		?	-	-	?	?	?	?	?	?	?	?	?	78.9e	5.2	75.1	7.1	?	?	?	?	?	?	?	?	?	?	?	?	?	?	?	?	?	?	?	?
MPC-D110/19		?	-	-	?	?	?	?	?	?	?	?	?	?	?	?	?	?	?	?	?	?	?	?	?	?	115e	?	?	?	?	?	?	?	?	?	?
MPC-D110/20		-	-	-	-	50e	-	-	-	-	-	-	-	-	-	-	-	-	-	-	-	-	-	-	-	-	-	-	-	-	-	-	-	-	-	-	-
MPC-D110/21		?	-	-	?	?	?	27.8	68.2	?	?	61.3	7	54.6e	3.6	55	5.5	22.8	34+	?	?	?	?	?	?	?	?	?	?	?	164	16	?	?	?	?	?
MPC-D110/22		?	-	-	?	42e	?	?	?	?	?	?	?	?	?	?	?	?	?	?	?	?	?	?	?	?	?	?	?	?	?	?	?	?	?	?	?
MPC-D110/25		?	-	-	?	?	?	?	?	97	9.8	?	?	?	?	?	?	?	?	?	?	?	?	?	?	?	?	?	?	?	?	?	?	?	?	?	?
MPC-D110/26		?	-	-	?	?	?	?	?	?	?	?	?	?	?	?	?	?	?	?	?	?	?	?	?	?	?	?	?	?	?	?	10.6	13.9	?	?	17.9
MPC-D110/30		?	-	-	?	?	?	?	?	?	?	?	?	?	?	?	?	26	?	?	38	30e	27.5e	33	25	?	?	?	?	?	?	?	?	?	?	?	?
PIN*		92	38	44	26	35	44	27	68	-	-	-	-	-	-	-	-	-	-	-	-	-	-	-	-	-	-	-	?	-	-	-	-	-	-	-	-
UALVP 49391*		118	32	56	52	42	48	32	89	-	-	-	-	-	-	-	-	-	-	-	-	-	-	-	-	-	-	-	-	-	-	-	-	-	-	-	-
UALVP 49392*		99	28	45	38	35	46.8	31.8	86.6	-	-	-	-	-	-	-	-	-	-	-	-	-	-	-	-	-	-	-	-	-	-	-	-	-	-	-	-
Zpal MgD-I/099		?	-	-	?	?	?	?	?	210	20	?	?	?	?	?	?	?	?	?	?	?	?	?	?	?	270	?	?	?	?	?	?	?	?	?	?
Zpal MgD-I/100		?	-	-	?	?	?	?	?	?	13.4	108	12.5	?	?	?	?	?	?	?	18	19	21	22	24	?	210	?	21	79	?	?	?	?	?	?	?
Zpal MgD-I/106		?	-	-	?	?	?	?	?	?	13	?	?	?	?	?	?	?	?	?	?	?	?	?	?	?	?	?	21	73	?	?	?	?	?	?	?
MPC-D100/80-D**		115.6	32.4	52.1	44	36.8	-	-	-	-	-	-	-	-	-	-	-	-	-	-	-	-	-	-	-	-	-	-	-	-	-	-	-	-	-	-	-
MPC-D100/97		-	-	-	-	-	-	-	-	-	-	-	-	-	-	-	-	-	-	-	-	-	-	-	-	-	-	185	19.2	69	258	25	-	-	-	-	-
MPC-D100/47		?	-	-	?	?	?	?	?	?	?	?	?	?	?	?	?	?	?	?	?	?	?	?	?	?	173	195	19	64	258	26	?	?	?	?	?
Gigantoraptor erlianensis
LH V0011 [79]		-	-	-	-	-	-	-	-	-	-	735	-	-	-	-	-	-	-	-	-	-	-	-	-	-	-	1100	-	349	1180	-	-	-	-	-	-
Hagryphus giganteus
UMNH VP 12765 [80]		-	-	-	-	-	-	-	-	-	-	-	-	-	-	-	-	66	122	87	87	-	95	99	-	54	-	-	-	-	-	-	-	-	-	-	-
Heyuannia huangi
HYMV1-1 [14,81]		150	-	-	?	?	?	60	150e	?	?	?	?	?	?	?	?	?	?	?	?	?	?	?	?	?	260	255	28	90	320	30	?	20	10	10	?
HYMV1-2 [81)]		?	-	-	?	?	?	?	?	160plus	20	130	20	110	8	127	10	32	?	?	?	?	?	?	?	?	?	255	?	?	315	?	?	?	?	?	?
HYMV1-8		-	-	-	-	-	-	-	-	-	-	-	-	-	8	-	10	-	-	-	-	-	-	-	-	-	-	-	-	-	-	-	-	-	-	-	-
HYMVI [78, Fig. 13.4]		-	-	-	-	-	-	-	-	-	-	105	-	-	-	103	-	29	57	52	32	35	17	16	21	-	-	-	-	-	-	-	-	-	-	-	-
Ingenia yanshini
MPC-D100/30**		?	-	-	?	?	?	?	?	166	16.3	141	16.8			116	11.6	31.6	50.3	46.5		49.2	21.3	19.8	25.8	12.8	-	-	-	-	290	26.8	-	-	-	-	-
MPC-D100/31		?	-	-	?	?	55	44	105	?	?	?	?	102.6	8.3	?	?	30.3	46.2	44	33.5	46.9	18.7	16.2	25.7	7.2	228	241	24.3	83	?	?	18.7	14.5	11.5	10.6	33.3
MPC-D100/32		?	-	-	?	?	53.7	43	120est	155plus	17	140	16.6	110.5	9.9	115.2	12.5	?	50.5	41.6	34.9	48.9	21.9	18.9	25.7	12.6	242	254	26	86	294	26	18.9	16	11.6	11.2	32
MPC-D100/33		?	-	-	?	?	?	?	?	173	15.1	128	14.3	94.7	8	99	9.5	23.8	41.7	32plus	27.7	39.5	17.5	14.5	20	?	?	233	24	76	267	24	17.4	13.9	9.8	9.2	30.2
MPC-D100/34		?	-	-	?	?	?	?	?	80	7.4	69+	7.5	?	?	?	?	?	?	?	?	?	?	?	?	?	119	135	13	48	162	14.5	11.8	10.8	6.4	6.2	18
MPC-D100/35		?	-	-	?	?	?	?	?	?	?	?	?	?	?	?	?	?	?	?	?	?	?	?	?	?	?	135	12	44	?	13	?	?	?	?	?
MPC-D100/36		?	-	-	?	?	?	?	?	?	?	?	?	?	?	?	?	?	?	?	?	?	?	?	?	?	176	182	19	64	215	18	14.6	13.5	9.6	7.3	18.9
MPC-D110/02		?	-	-	?	?	?	?	?	?	?	?	?	?	?	?	?	?	?	?	?	?	?	?	?	?	?	?	?	?	?	?	?	?	?	?	?
MPC-D110/03		?	-	-	?	?	?	?	?	?	?	73.5	7.4	54.7	4.3	55.3	5.4	15.4	23.8	?	16.8	19	9.5	?	?	?	?	?	?	?	?	?	?	?	?	?	?
Khaan mckennai
MPC-D100/1002		106	-	-	47	31	50	33	99	143	13.9	116	?	95	8	96.5	9.9	22.5	49.9	47	38	44.5	26	28.3	37	16.2	185	192	21	?	225	20.5	15.3	14	11.5	10.7	31
MPC-D100/1127**		-	-	-	-	-	-	-	-	-	-	-	-	-	-	-	-	-	-	-	-	-	-	-	-	-	185	190	-	-	-	-	-	-	-	-	-
MPC-D100/973		-	-	-	-	-	-	-	-	-	-	-	-	-	-	-	-	-	-	-	-	-	-	-	-	-	-	-	-	-	-	-	-	-	-	-	-
Machairasaurus leptonychus
IVPP 15979		?	-	-	?	?	?	?	?	?	?	?	?	?	?	?	?	24	38	34	30	29	21	22	24	12	?	?	?	?	?	?	?	?	?	?	?
IVPP V9608		?	-	-	?	?	?	?	?	?	?	?	?	?	?	?	?	32	?	?	79	50	60	66	?	38	?	?	?	?	?	25	28	27	?	?	?
Nemegtomaia barsboldia
MPC-D100/2112		179	-	-	78	52	?	49	153	?	?	?	?	?	?	?	?	?	?	?	?	?	?	?	?	?	290	-	?	?	?	?	?	?	?	?	?
MPC-D107/16		-	-	-	-	-	-	-	-	-	-	-	7.1	-	7.3	-	9.4	17.7	34	31	24.9	34	16	13.5	16	9.7	-	-	22.9	71	-	-	-	-	-	-	-
MPC-D107/15		172	44.8	105.1	70.8	50est	64	50.1	152	180plus	14	-	19	-	12	-	14	-	-	-	34plus	44plus	-	18	32	-	-	-	35	-	-	30	25	23	16	18.8	33
Nomingia gobiensis
MPC D-100/119		170e	-	-	?	?	?	?	?	?	?	?	?	?	?	?	?	?	?	?	?	?	?	?	?	?	248	287	31	86+	350	30.7	?	?	?	?	?
Oviraptor philoceratops
AMNH 6517 [1]		111	-	-	78	42	?	?	195	230		185	?	163	?	147	?	?	107	97	78	55	55	68	48	37	?	?	?	?	?	?	?	?	?	?	?
Oviraptorid incertae sedis
MPC uncatalogued 1		147.3	59	68	69	47	66.8	40.6	120	-	-	-	-	-	-	-	-	24	-	-	30.1	31.7	-	17.8	18.8	-	-	238	-	-	275	-	17	13.3	10	9.3	30
MPC uncatalogued 1		162	49.8	62	70.7	38.6	-	-	-	-	-	113	-	90	7.7	98est	10.2	22.4	40.6	-	29.2	35.2	19.6	15	18	-	-	220	-	-	265	-	15.8	13.6	9.9	8.9	27.3
MPC-D100/1018 [82]		-	-	-	-	-	-	-	-	-	-	17	-	-	-	-	-	-	-	-	-	-	-	-	-	-	-	30	-	-	42	-	-	-	-	-	-
MPC-D100/1019-1 [82]		-	-	-	-	-	-	-	-	-	-	22	-	-	-	-	-	-	-	-	-	-	-	-	-	-	-	?	-	-	?	-	-	-	-	-	-
MPC-D100/971 [82]		-	-	-	-	-	-	-	-	-	-	20	-	-	-	-	-	-	-	-	-	-	-	-	-	-	-	36	-	-	50	-	-	-	-	-	-
UALVP 49393*		-	41	105	81	45	94	50	139	-	-	-	-	-	-	-	-	-	51plus	51plus	57.5	47	56	55	47	38	-	-	-	-	-	-	-	-	-	-	-
UALVP 49394*		112	24	61	46	32	55.8	37	99.8	-	-	-	-	-	-	-	-	-	-	-	-	-	-	-	-	-	-	-	-	-	-	-	-	-	-	-	-
Rinchenia mongoliensis
MPC-D100/32a		156	-	-	64	45	85	56	150	193	15	163	17.8	103.3e	10.5	?	12.9	?	?	?	?	?	?	?	?	?	225	287	25	94	?	30e	23.8	17	12	11.9	33
* Cast
** Holotype
references in brackets
